# Supplementary material for: Fabrication of Self-Lubricating Porous UHMWPE with Excellent Mechanical Properties and Friction Performance via Rotary Sintering
Source: PubMed Central journal article supplement (PMC7361689; doi:10.3390/polym12061335), 2020-06-12
Supplement: polymers-12-01335-s001.pdf [file polymers-12-01335-s001.pdf]

**Table S1 The compressive strength (MPa) of the samples under different process conditions.**

| Temperature<br>(°C) | Molding<br>state | Charging amount (g) |       |       |       |       |       |
|---------------------|------------------|---------------------|-------|-------|-------|-------|-------|
|                     |                  | 3.0                 | 3.2   | 3.4   | 3.6   | 3.8   | 4.0   |
| 170                 | static           | --                  | 19.79 | 21.31 | 26.63 | 27.34 | 27.83 |
|                     | dynamic          | 19.99               | 22.80 | 24.29 | 29.51 | 30.67 | 31.83 |
| 180                 | static           | --                  | 21.68 | 22.25 | 25.46 | 29.64 | 32.99 |
|                     | dynamic          | 21.88               | 24.20 | 26.67 | 30.70 | 32.58 | 33.83 |
| 190                 | static           | 18.47               | 20.26 | 23.63 | 24.16 | 31.27 | 34.57 |
|                     | dynamic          | 22.74               | 25.00 | 27.68 | 32.51 | 34.73 | 36.09 |
| 200                 | static           | 21.76               | 22.62 | 27.51 | 28.46 | 34.12 | 36.74 |
|                     | dynamic          | 25.05               | 26.35 | 31.21 | 33.67 | 36.83 | 37.89 |

**Table S2 The bending strength (MPa) of the samples under different process conditions.**

| Temperature<br>(°C) | Molding<br>state | Charging amount (g) |      |       |       |       |       |
|---------------------|------------------|---------------------|------|-------|-------|-------|-------|
|                     |                  | 3.0                 | 3.2  | 3.4   | 3.6   | 3.8   | 4.0   |
| 170                 | static           | --                  | 5.80 | 7.56  | 10.56 | 12.65 | 14.32 |
|                     | dynamic          | 6.03                | 7.46 | 9.24  | 11.58 | 13.78 | 16.29 |
| 180                 | static           | --                  | 6.70 | 8.66  | 10.88 | 13.06 | 14.81 |
|                     | dynamic          | 6.14                | 7.69 | 9.55  | 11.88 | 13.97 | 16.43 |
| 190                 | static           | 5.28                | 6.83 | 9.01  | 11.26 | 13.44 | 15.36 |
|                     | dynamic          | 6.27                | 7.78 | 9.86  | 12.05 | 14.30 | 16.85 |
| 200                 | static           | 5.62                | 7.25 | 9.31  | 11.32 | 13.42 | 16.25 |
|                     | dynamic          | 7.13                | 8.13 | 10.27 | 12.65 | 14.81 | 17.85 |
